# Supplementary material for: Engineering of the Escherichia coli Im7 immunity protein as a loop display scaffold
Source: Oxford University Press journal article supplement (doi:10.1093/protein/gzl005), 2006-03-20
Supplement: gzl005_Supplementary_Data.zip [file gzl005_Supplementary_Data.zip]

**Supplementary Table 1.** Modeller objective scores for Im7-H3 b12 chimeric proteins

|           | Model 1 | Model 2  | Model 3 | Model 4 |
|-----------|---------|----------|---------|---------|
| <b>1</b>  | 12.6220 | -14.2371 | 21.1132 | 21.5221 |
| <b>2</b>  | 13.2503 | -11.0027 | 21.9625 | 21.7162 |
| <b>3</b>  | 14.9604 | -10.3411 | 22.4676 | 26.4541 |
| <b>4</b>  | 17.0597 | -6.9931  | 22.5835 | 26.6196 |
| <b>5</b>  | 20.5193 | -2.5026  | 25.5479 | 28.0275 |
| <b>6</b>  | 20.7005 | 3.8923   | 25.5664 | 28.1927 |
| <b>7</b>  | 20.9482 | 6.9841   | 25.7910 | 28.6494 |
| <b>8</b>  | 22.2490 | 7.3610   | 29.8908 | 28.8045 |
| <b>9</b>  | 22.7287 | 8.6810   | 30.2793 | 29.5754 |
| <b>10</b> | 23.8085 | 8.8402   | 30.4463 | 30.4111 |
