# Supplementary material for: Engineering of the Escherichia coli Im7 immunity protein as a loop display scaffold
Source: Oxford University Press journal article supplement (doi:10.1093/protein/gzl005), 2006-03-20

a

|              |    |                            |                          |                                 |                           |    |
|--------------|----|----------------------------|--------------------------|---------------------------------|---------------------------|----|
| Wildtype Im7 | 1  | MELKNSISDYTEAEFVQLLKEIEKEN | <b>VAA</b>               | -----                           | <b>TDD</b> VLDVLLLEHFV    | 42 |
| Model1       | 1  | MELKNSISDYTEAEFVQLLKEIEKEN | <b>VA</b>                | - <b>ARVGPYSWDDSPQDNYMDVW</b>   | <b>D</b> VLDVLLLEHFV      | 60 |
| Model2       | 1  | MELKNSISDYTEAEFVQLLKEIEKEN | <b>V</b>                 | --- <b>RVGPYSWDDSPQDNYM</b>     | -- <b>DD</b> VLDVLLLEHFV  | 56 |
| Model3       | 1  | MELKNSISDYTEAEFVQLLKEIEKEN | <b>VA</b>                | ---- <b>PYSWDDSPQDNY</b>        | -- <b>TDD</b> VLDVLLLEHFV | 53 |
| Model4       | 1  | MELKNSISDYTEAEFVQLLKEIEKE  | <b>I</b>                 | --- <b>ARVGPYSWDDSPQDNYMDVW</b> | -VLDVLLLEHFV              | 57 |
|              |    |                            |                          |                                 |                           |    |
| Wildtype Im7 | 43 | KITEHPDGTDLIYPSDNRRD       | SPEGIVKEIKEWRAANGKPGFKQG | 87                              |                           |    |
| Model1       | 61 | KITEHPDGTDLIYPSDNRRD       | SPEGIVKEIKEWRAANGKPGFKQG | 105                             |                           |    |
| Model2       | 57 | KITEHPDGTDLIYPSDNRRD       | SPEGIVKEIKEWRAANGKPGFKQG | 101                             |                           |    |
| Model3       | 54 | KITEHPDGTDLIYPSDNRRD       | SPEGIVKEIKEWRAANGKPGFKQG | 98                              |                           |    |
| Model4       | 58 | KITEHPDGTDLIYPSDNRRD       | SPEGIVKEIKEWRAANGKPGFKQG | 102                             |                           |    |

b

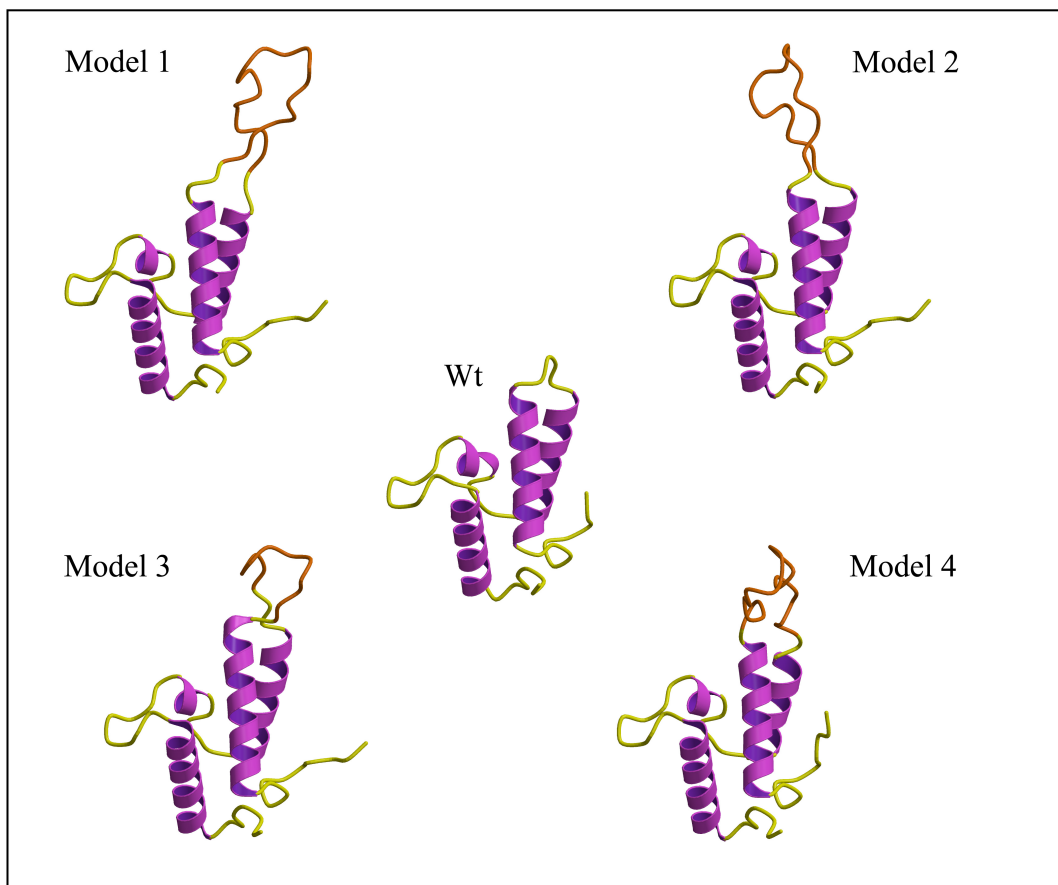

Supplement: gzl005_Supplementary_Data.zip [file gzl005_Supplementary_Data.zip]
