# Supplementary figures and images for: Engineering of the Escherichia coli Im7 immunity protein as a loop display scaffold
Source: Oxford University Press journal article supplement (doi:10.1093/protein/gzl005), 2006-03-20

**a**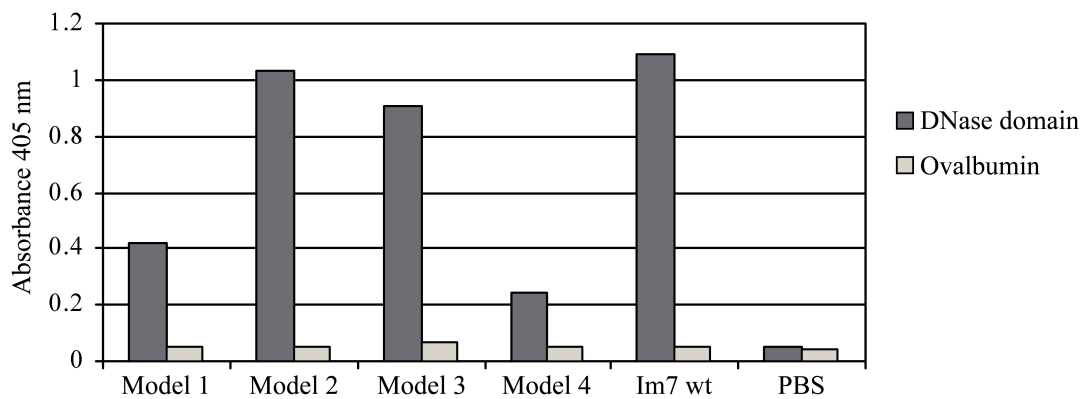**b**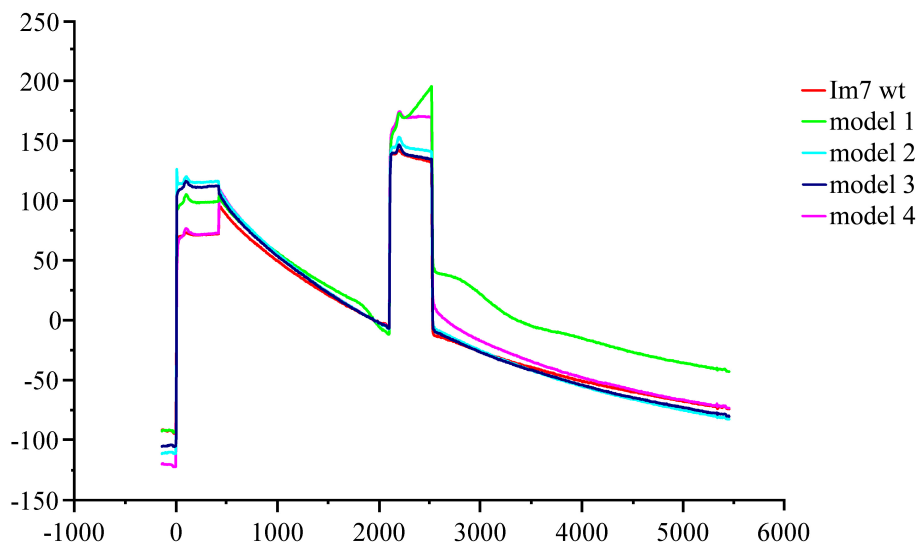

Supplement: gzl005_Supplementary_Data.zip [file gzl005_Supplementary_Data.zip]
